# Supplementary material for: Impacts of Government Credit on Government Performance of Public-Private Partnership Project in China: A WSR System Theory Perspective
Source: MDPI journal article supplement (doi:10.3390/su14116886), 2022-06-05
Supplement: s1 [file s1]

## Supplementary Materials File S1

### Questionnaire（测量条款）

**Notice（注意）：** In the following items（在后续题项中），

1- Extremely Disagree（极其不同意）

2- Disagree（不同意）

3- Moderately（既不同意也不反对）

4- Agree（同意）

5- Extremely Disagree（极其同意）

| No.<br>编号       | Items<br>题项                                                                                                                            | Options<br>选项 |   |   |   |   |
|-----------------|----------------------------------------------------------------------------------------------------------------------------------------|---------------|---|---|---|---|
| Q <sub>1</sub>  | The PPP project-related laws and regulations promulgated by the government are complete and continuous.<br>政府颁布的 PPP 项目相关法律法规完善且具有连续性. | 1             | 2 | 3 | 4 | 5 |
| Q <sub>2</sub>  | The PPP project-related policies formulated by the government are stable and continuous.<br>政府制定的 PPP 项目相关政策稳定且具有连续性.                  | 1             | 2 | 3 | 4 | 5 |
| Q <sub>3</sub>  | The government agencies in the PPP project are reasonably set up.<br>PPP 项目政府机构设置合理.                                                   | 1             | 2 | 3 | 4 | 5 |
| Q <sub>4</sub>  | The city where the government is located has a good local economic scale, development speed and quality.<br>政府当地经济规模、发展速度及质量良好.        | 1             | 2 | 3 | 4 | 5 |
| Q <sub>5</sub>  | The total amount of government finance, revenue and expenditure are in good condition.<br>政府财政总量、收支平衡状况良好.                             | 1             | 2 | 3 | 4 | 5 |
| Q <sub>6</sub>  | The scale and term of government debt are reasonable.<br>政府债务规模、期限合理.                                                                  | 1             | 2 | 3 | 4 | 5 |
| Q <sub>7</sub>  | The government provides a fair and just bidding environment for PPP projects.<br>政府PPP项目招投标环境公平公正.                                     | 1             | 2 | 3 | 4 | 5 |
| Q <sub>8</sub>  | The government's infrastructure supply for PPP projects is complete and timely.<br>政府对PPP项目的基础设施供应齐全且及时.                               | 1             | 2 | 3 | 4 | 5 |
| Q <sub>9</sub>  | The government's supervision of PPP projects is in place.<br>政府对PPP项目监管到位.                                                             | 1             | 2 | 3 | 4 | 5 |
| Q <sub>10</sub> | The government's information on PPP projects is open and transparent.<br>政府对PPP项目的信息公开、透明.                                             | 1             | 2 | 3 | 4 | 5 |
| Q <sub>11</sub> | No corruption or misappropriation of public funds by government officials in the PPP project.<br>PPP项目政府官员不存在腐败、贪污现象.                  | 1             | 2 | 3 | 4 | 5 |

|                 |                                                                                                                                                       |   |   |   |   |   |
|-----------------|-------------------------------------------------------------------------------------------------------------------------------------------------------|---|---|---|---|---|
| Q <sub>12</sub> | The PPP project is fully supported by higher-level government departments.<br>PPP项目得到政府上级部门充分支持.                                                      | 1 | 2 | 3 | 4 | 5 |
| Q <sub>13</sub> | The PPP projects have received effective public participation.<br>PPP项目得到公众有效参与.                                                                      | 1 | 2 | 3 | 4 | 5 |
| Q <sub>14</sub> | The PPP project contractors and the government have reached mutual commitments and shared responsibilities.<br>PPP项目承包商与政府之间达成相互承诺与责任分担.              | 1 | 2 | 3 | 4 | 5 |
| Q <sub>15</sub> | The PPP projects have reasonable risk allocation, sharing and transfer mechanisms.<br>PPP项目有合理风险分配、共享与转移机制.                                           | 1 | 2 | 3 | 4 | 5 |
| Q <sub>16</sub> | The government has a thorough understanding of the PPP model and has the ability to control.<br>政府对PPP模式理解透彻，具有掌控能力.                                  | 1 | 2 | 3 | 4 | 5 |
| Q <sub>17</sub> | The PPP project is technically feasible, the project can be constructed, and the completed project can be maintained.<br>PPP项目技术可行、工程可建造、完工可维护.       | 1 | 2 | 3 | 4 | 5 |
| Q <sub>18</sub> | High satisfaction with government departments in PPP projects.<br>PPP项目政府部门满意度高.                                                                      | 1 | 2 | 3 | 4 | 5 |
| Q <sub>19</sub> | The construction period and concession period of the PPP project are reasonable.<br>PPP项目建造工期和特许权期时间合理.                                               | 1 | 2 | 3 | 4 | 5 |
| Q <sub>20</sub> | High public satisfaction with PPP projects.<br>PPP项目公众满意度高.                                                                                           | 1 | 2 | 3 | 4 | 5 |
| Q <sub>21</sub> | The government has good planning and strong supervision of PPP projects.<br>政府对PPP项目有良好规划及有力监督.                                                       | 1 | 2 | 3 | 4 | 5 |
| Q <sub>22</sub> | The relevant organization of the PPP project and the management of the interface between the various stages are reasonable.<br>PPP项目相关组织及各阶段之间界面管理合理. | 1 | 2 | 3 | 4 | 5 |
